# Supplementary material
Source: PubMed Central journal article supplement (PMC3340138)
Supplement: supp_M111.338731_jbc.M111.338731-3.pdf [file supp_M111.338731_jbc.M111.338731-3.pdf]

h1

h2

h3

TssL homologues

IcmH/DotU homologues

Sequence alignment for TssL and IcmH/DotU homologues across regions h1, h2, and h3. Includes accession numbers (e.g., gi|284924248|TssL) and a consensus sequence at the bottom: .....i.....p..ul.v.qlr.g....dg..ly.....!...r..l..a6.g.s.....!Ya.CalloE.v.r.....

h4 h5

h6

h7

h8

TMS

Sequence alignment for h4, h5, h6, h7, h8, and TMS regions. Includes accession numbers (e.g., gi|284924248|TssL) and a consensus sequence at the bottom: d.g.y..H...pl.qa.%f.t.l.a6#.lu#r.r..l.epap..avltc.yr.l.lgf.G.Yr.....#..v..l.v.....pl.....r..r.....H.....v.l..u..s..l..l.....
